# Supplementary material for: Influence of coordination structure of Fe-585DV/NxC4−x on the electrocatalytic performance of oxygen reduction reactions
Source: Royal Society of Chemistry journal article supplement (doi:10.1039/d3ra04270g), 2023-01-01
Supplement: d3ra04270g1.pdf [file d3ra04270g1.pdf]

## Supporting Information

### Coordination structure of the Fe-585DV/N<sub>x</sub>C<sub>4-x</sub> on the electrocatalytic performance of Oxygen Reduction Reactions

Ren Li,<sup>†a</sup> Lei Zhang,<sup>†b</sup> Yi Wang,<sup>a</sup> Jinbo Bai,<sup>c</sup> Xiaolin Li,<sup>d\*</sup> and Chunmei Zhang<sup>e\*</sup>

Generation of OH\*O\* and OH\*OH\* pathways in the ORR (Oxygen Reduction Reaction) process:

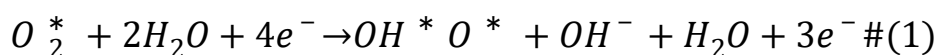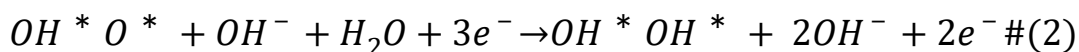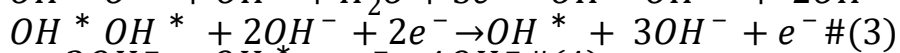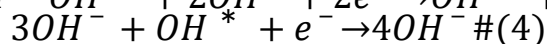

Where \* stands for an active site on the catalyst. The intermediates of the ORR reaction, including OO\*, OH\*O\*, OH\*OH\*, and OH\*, are adsorbed onto the active sites.

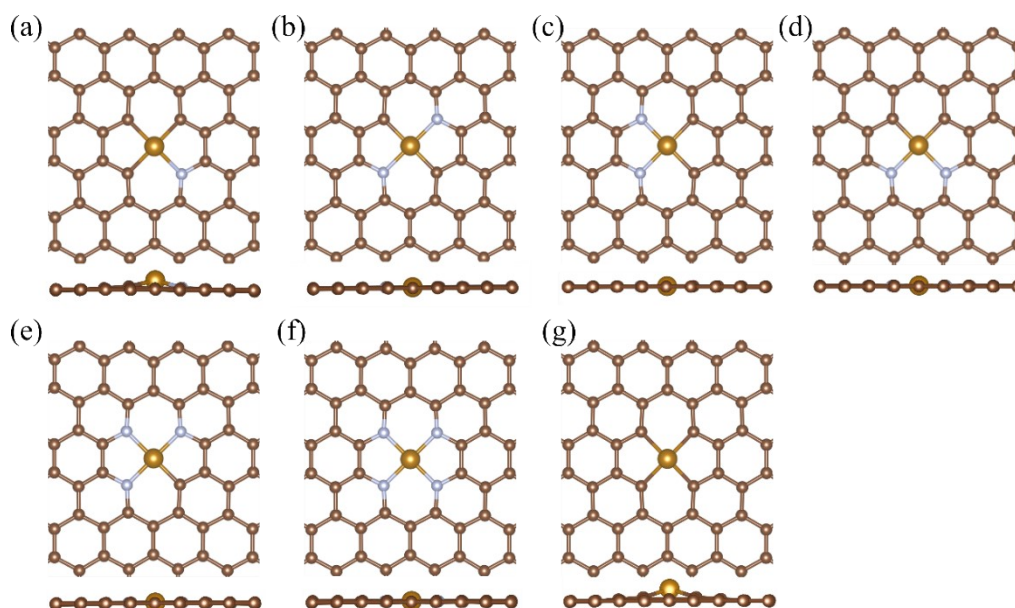

Figure S1. The geometry optimization structures of a. Fe-N<sub>1</sub>C<sub>3</sub>, b. Fe-N<sub>2</sub>C<sub>2</sub>(I), c. Fe-N<sub>2</sub>C<sub>2</sub>(II), d. Fe-N<sub>2</sub>C<sub>2</sub>(III), e. Fe-N<sub>3</sub>C<sub>1</sub>, f. Fe-N<sub>4</sub>, g. Fe-C<sub>4</sub>. The large yellow, small brown, and gray balls represent Fe, C and N atoms, respectively.

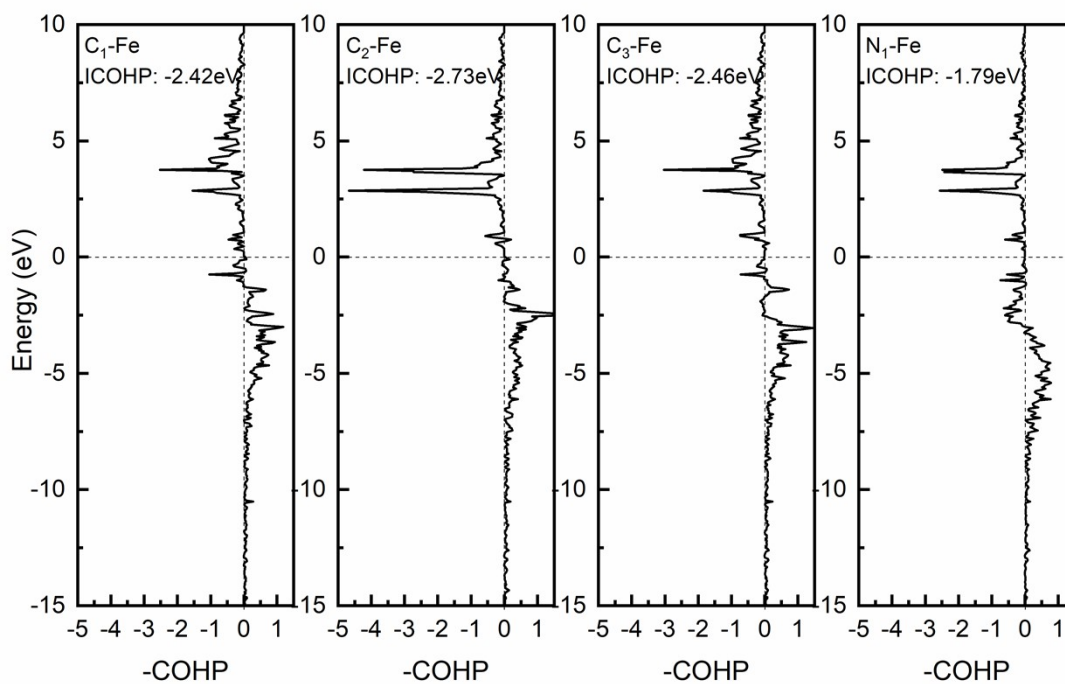

Figure S2(a). Fe-N<sub>1</sub>C<sub>3</sub> coordination structure with Fe-C and Fe-N bond COHP.

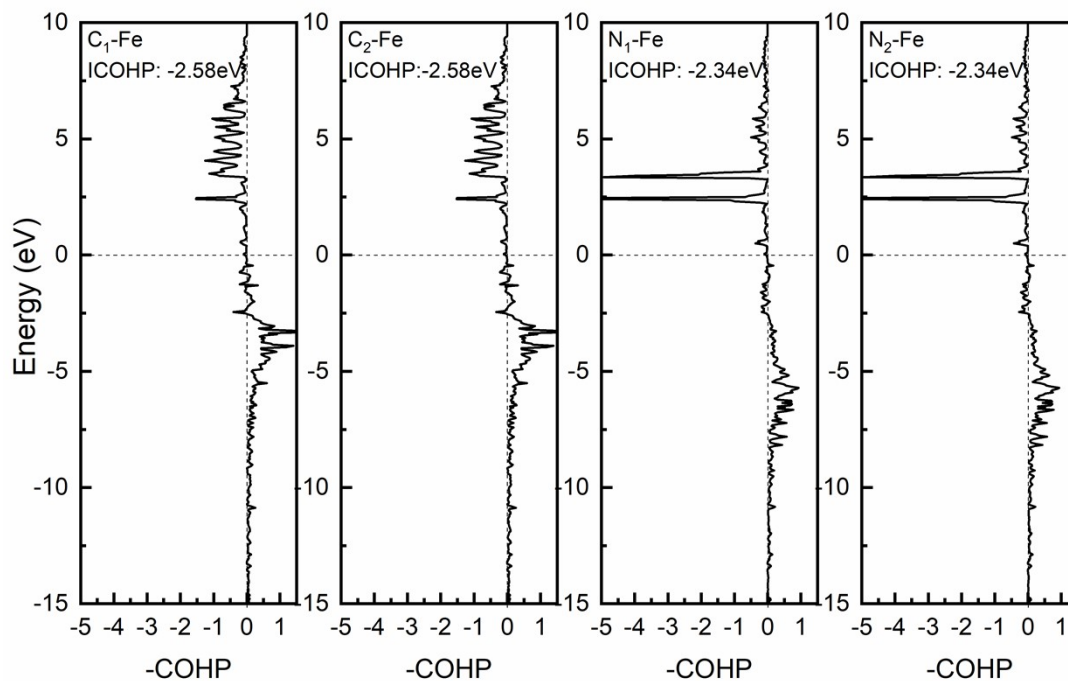

Figure S2(b). Fe-N<sub>2</sub>C<sub>2</sub>(I) coordination structure with Fe-C and Fe-N bond COHP.

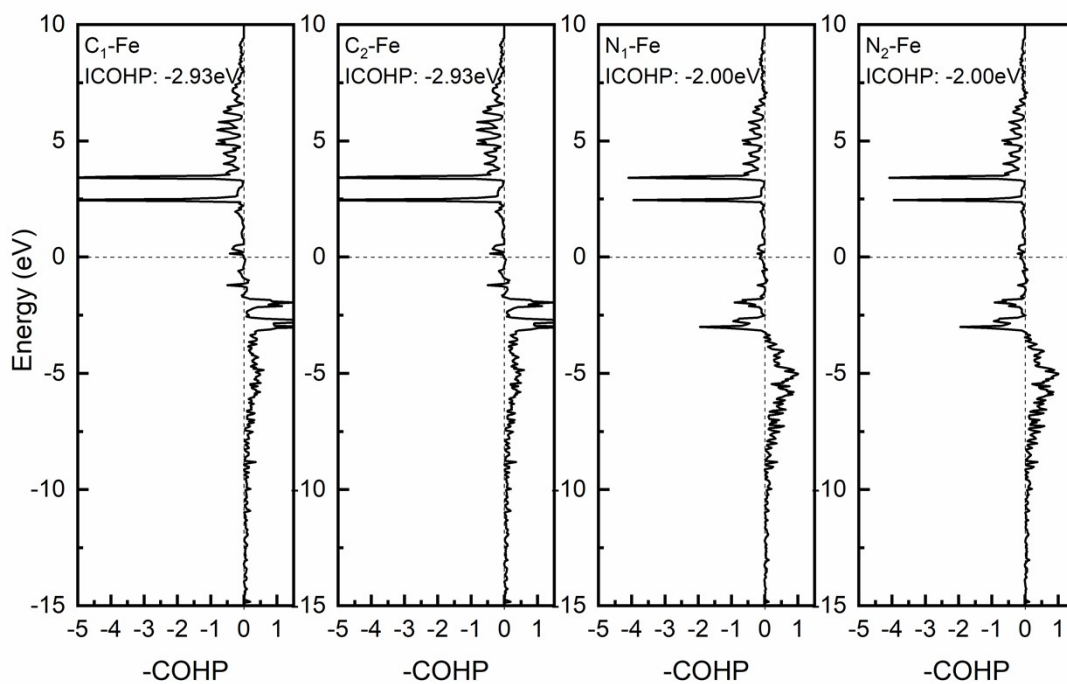

Figure S2(c). Fe-N<sub>2</sub>C<sub>2</sub>(II) coordination structure with Fe-C and Fe-N bond COHP.

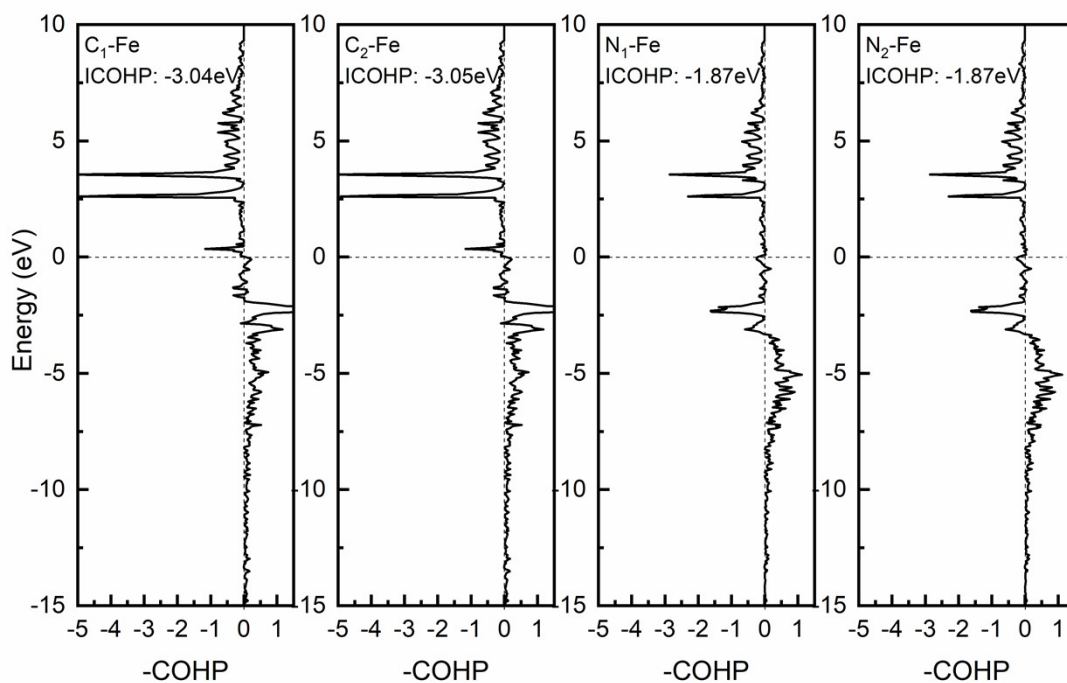

Figure S2(d). Fe-N<sub>2</sub>C<sub>2</sub>(III) coordination structure with Fe-C and Fe-N bond COHP.

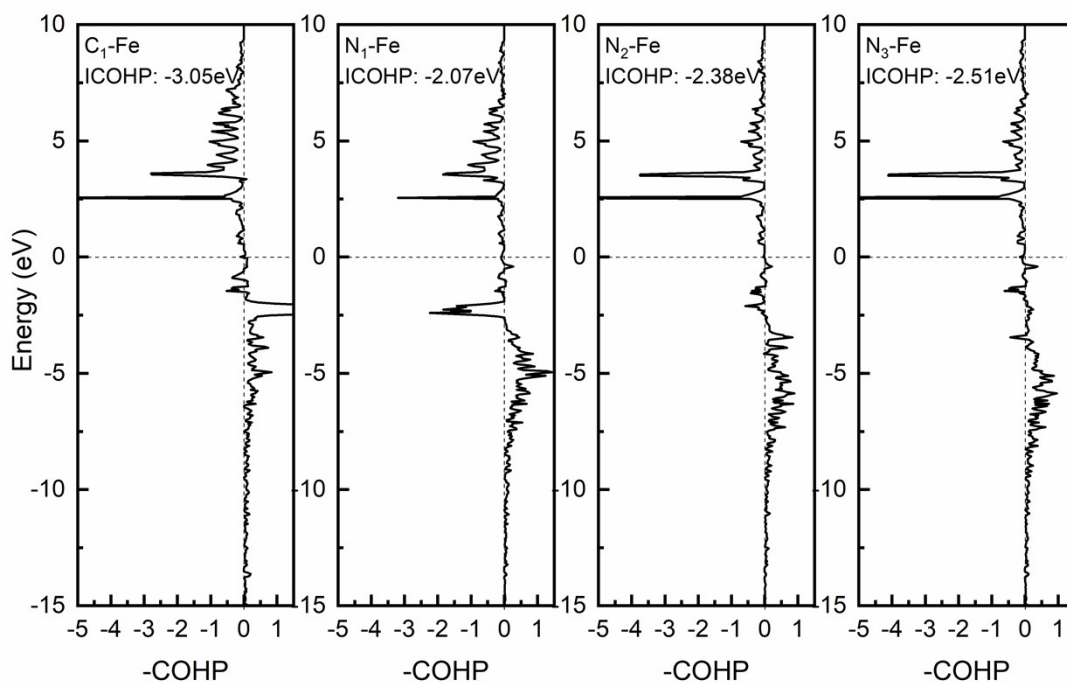

Figure S2(e). Fe-N<sub>3</sub>C<sub>1</sub> coordination structure with Fe-C and Fe-N bond COHP.

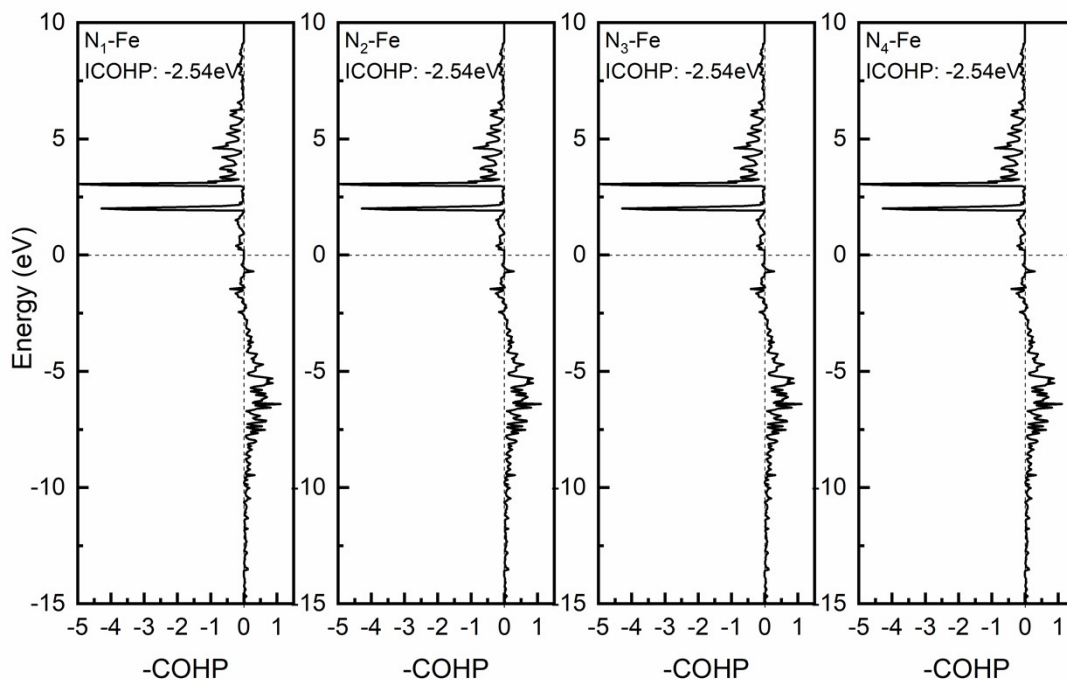

Figure S2(f). Fe-N<sub>4</sub> coordination structure with Fe-N bond COHP

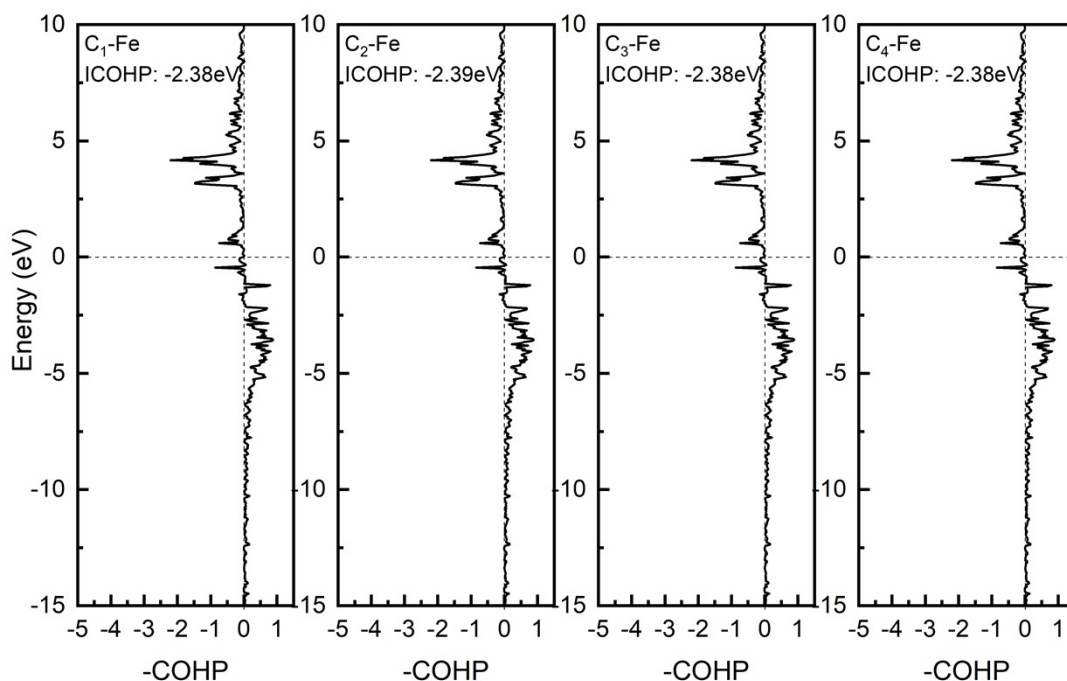

Figure S2(g). Fe-C<sub>4</sub> coordination structure with Fe-C bond COHP.

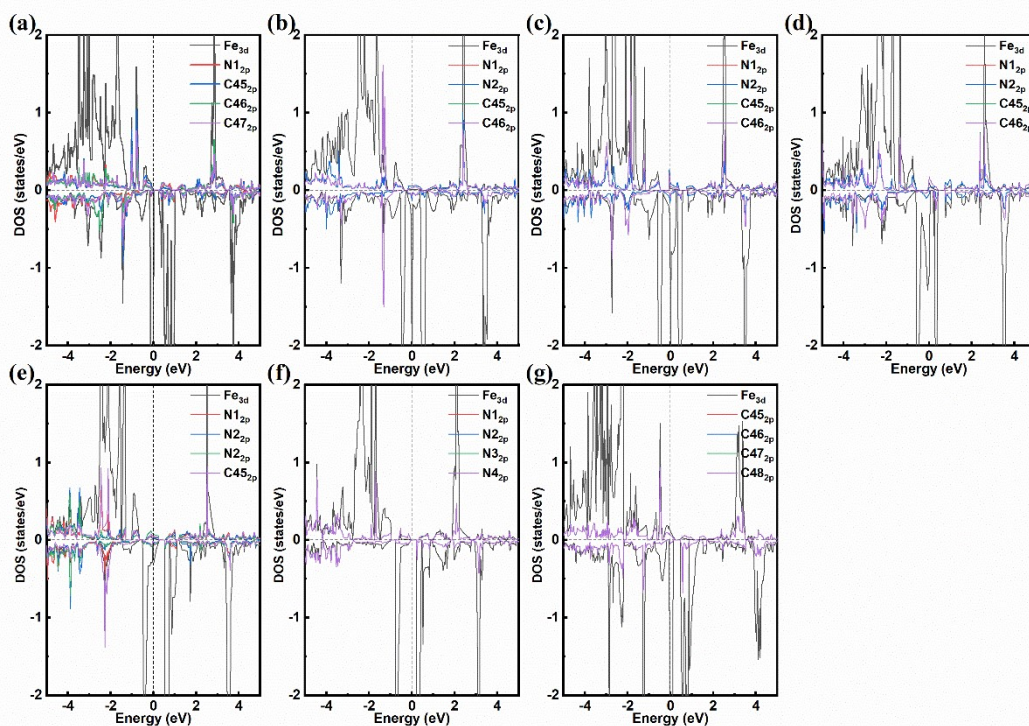

Figure S3. Fe and neighboring N and C projected state density for different Fe-585DV/N<sub>x</sub>C<sub>(4-x)</sub> structures. (a). Fe-N<sub>1</sub>C<sub>3</sub>, (b). Fe-N<sub>2</sub>C<sub>2</sub>(I), (c). Fe-N<sub>2</sub>C<sub>2</sub>(II), (d). Fe-N<sub>2</sub>C<sub>2</sub>(III), (e). Fe-N<sub>3</sub>C<sub>1</sub>, (f). Fe-N<sub>4</sub>, (g). Fe-C<sub>4</sub>.

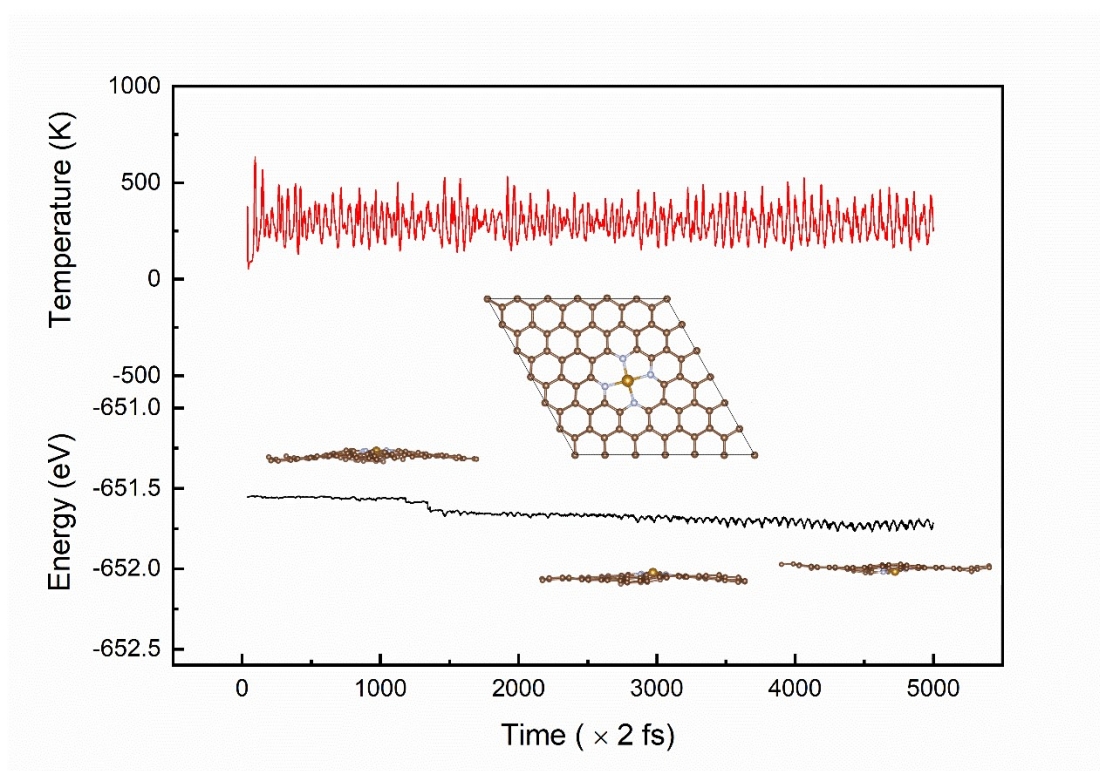

Figure S4. In the AIMD (Ab Initio Molecular Dynamics) simulation of Fe-N<sub>4</sub>, the figure illustrates the variations in temperature and energy with respect to time. Side views of the atomic configurations at 2 ps, 6 ps, and 10 ps are shown, along with a top view at 6 ps. The simulation was carried out at 300 K over a period of 10 ps, with a time step of 2 fs.

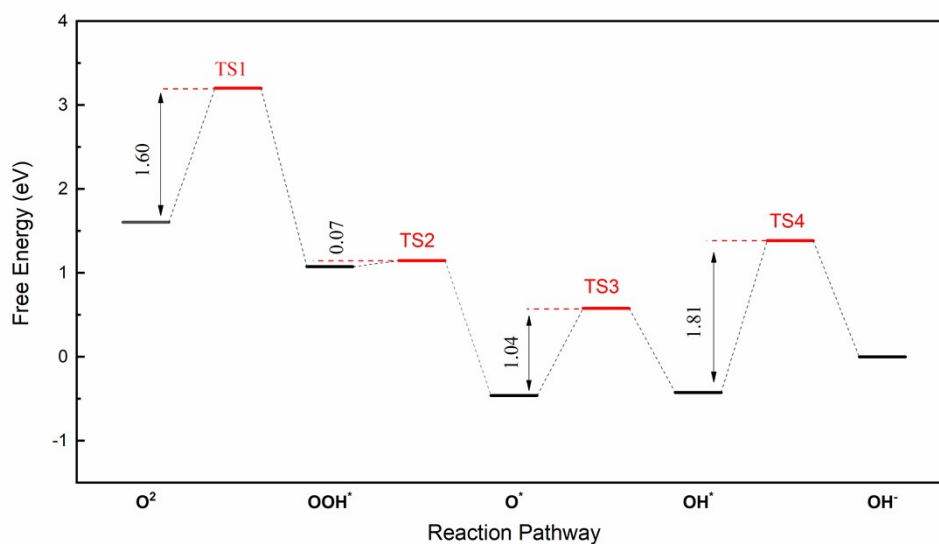

Figure S5. Transition states in the oxygen reduction reaction (ORR) pathway for the Fe-N<sub>4</sub> coordination structure.

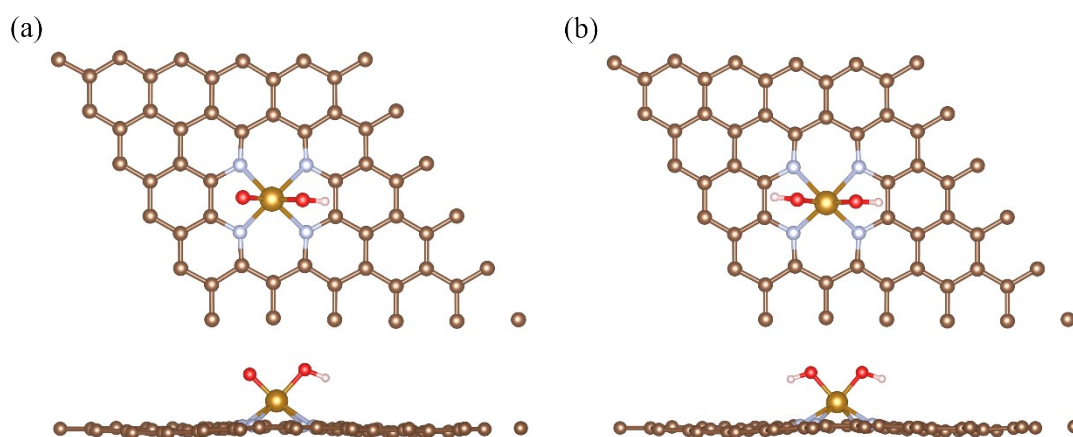

Figure S6. Coordination structure of Fe-N<sub>4</sub> adsorbed intermediate species (a) OH\*O\* and (b) OH\*OH\* in the structural diagrams.

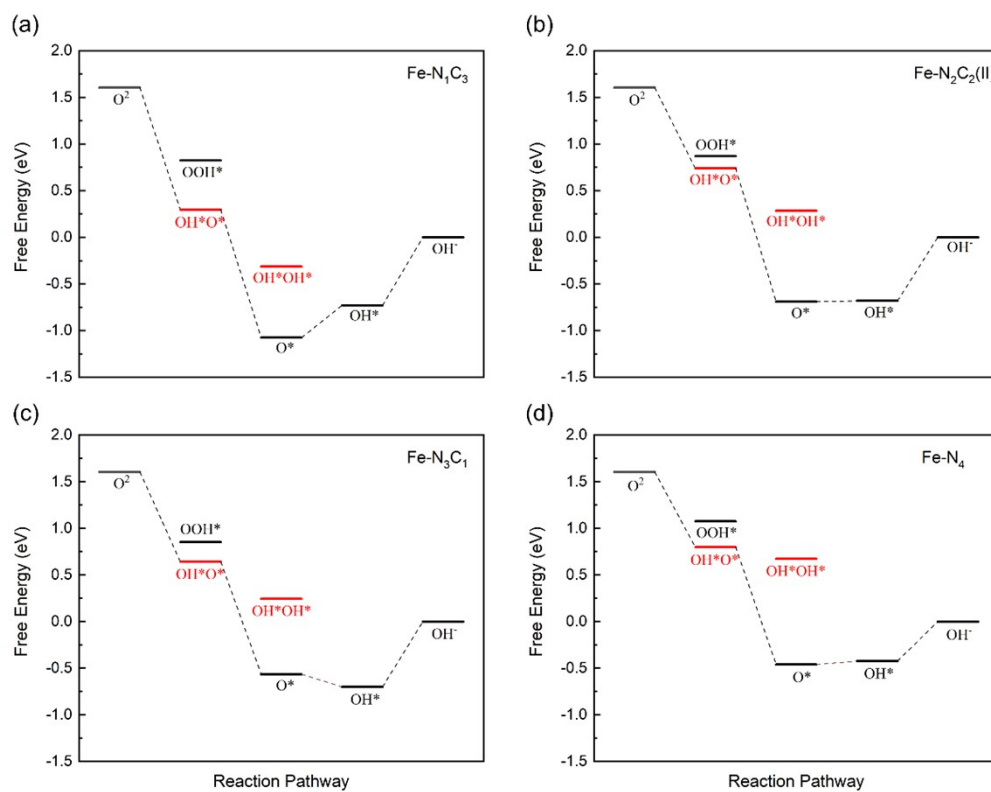

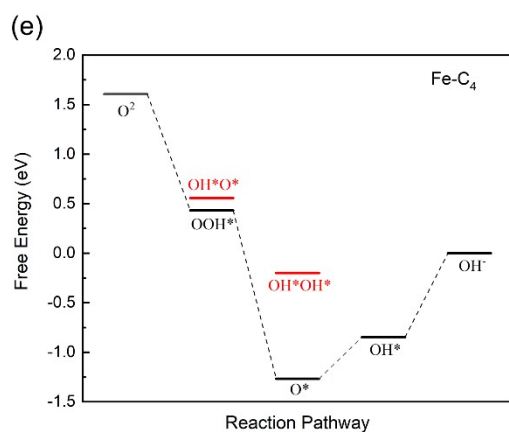

Figure S7. Gibbs energy profile of different N-coordination structures containing intermediates OH\*O and OH\*OH\* in alkaline media at zero electrode potential ( $U = 0$  V vs. NHE).

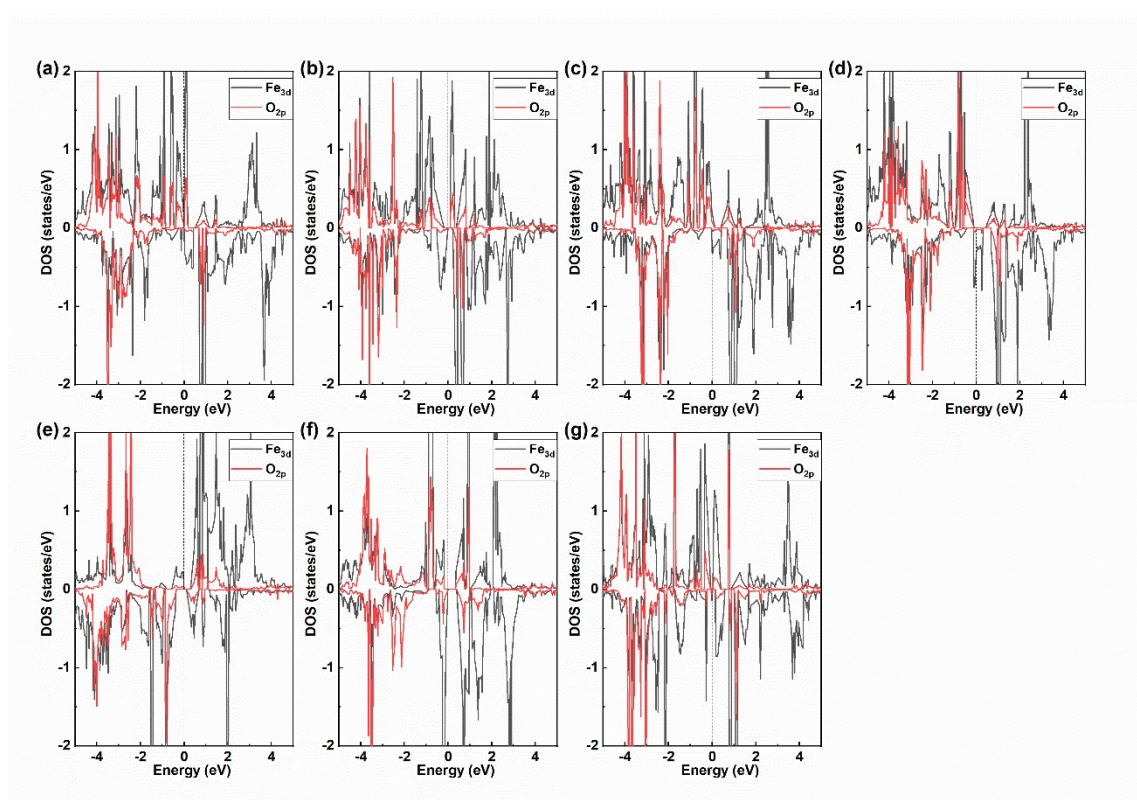

Figure S8. Projected density of states for Fe and O atoms after adsorption of \*OH on different Fe-585DV/ $N_x C_{(4-x)}$  structures. (a). Fe- $N_1 C_3$ , (b). Fe- $N_2 C_2$ (I), (c). Fe- $N_2 C_2$ (II), (d). Fe- $N_2 C_2$ (III), (e). Fe- $N_3 C_1$ , (f). Fe- $N_4$ . (g). Fe- $C_4$



Table S1 The changes in Gibbs free energy at each step of the reaction pathway ( $\Delta G_1$ ,  $\Delta G_2$ ,  $\Delta G_3$ ,  $\Delta G_4$ ) for the Gibbs energy profile in Figure S7, the Gibbs free energy of  $\text{OH}^*$

| Structure                             | $\Delta G_{1^*}/\text{eV}$ | $\Delta G_{2/\text{eV}}$ | $\Delta G_{3/\text{eV}}$ | $\Delta G_{4/\text{eV}}$ | $G_{\text{OH}^*}/\text{eV}$ | $\eta/\text{eV}$ |
|---------------------------------------|----------------------------|--------------------------|--------------------------|--------------------------|-----------------------------|------------------|
| V                                     |                            |                          |                          |                          |                             |                  |
| Fe-N <sub>4</sub>                     | -0.81                      | -0.12                    | -1.10                    | 0.42                     | -0.42                       | 0.82             |
| Fe-N <sub>1</sub> C <sub>3</sub>      | -1.31                      | -0.61                    | -0.42                    | 0.73                     | -0.73                       | 1.13             |
| Fe-N <sub>2</sub> C <sub>2</sub> (II) | -0.87                      | -0.46                    | -0.97                    | 0.68                     | -0.68                       | 1.08             |
| Fe-N <sub>3</sub> C <sub>1</sub>      | -0.96                      | -0.40                    | -0.94                    | 0.70                     | -0.70                       | 1.10             |
| Fe-C <sub>4</sub>                     | -1.05                      | -0.76                    | -0.65                    | 0.85                     | -0.85                       | 1.25             |

The ORR reaction in alkaline media at zero electrode potential (U = 0 V vs. NHE)

adsorption ( $G_{\text{OH}^*}$ ), and the overpotential ( $\eta$ ) for different Fe-585DV/N<sub>x</sub>C<sub>(4-x)</sub> structures.
